# Supplementary material for: Removal of Arsenate from Contaminated Water via Combined Addition of Magnesium-Based and Calcium-Based Adsorbents
Source: MDPI journal article supplement (doi:10.3390/su15054689), 2023-03-06
Supplement: s1 [file s1]

## Supplementary Materials:

**Table S1.** Characteristics of the adsorbents where  $\alpha$  is the measured content,  $P$  is the reagent purity,  $D_{p50}$  is the median particle size, and  $S_{BET}$  is the Brunauer–Emmett–Teller (BET) surface area.

| No.              | Adsorbent           | $\alpha_{Mg}$ (%) | $\alpha_{Ca}$ (%) | $P$ (%) | $D_{p50}$ ( $\mu m$ ) | $S_{BET}$ ( $m^2/g$ ) |
|------------------|---------------------|-------------------|-------------------|---------|-----------------------|-----------------------|
| (1) <sup>1</sup> | MgO                 | 59.1              | -                 | 98.0    | 1.54                  | 4.3                   |
| (2) <sup>1</sup> | Mg(OH) <sub>2</sub> | 40.6              | -                 | 97.3    | 4.13                  | 22.0                  |
| (3) <sup>1</sup> | MgCO <sub>3</sub>   | 24.8              | -                 | 86.1    | 15.0                  | 26.0                  |
| (4) <sup>1</sup> | CaO                 | -                 | 71.2              | 99.6    | 19.6                  | 2.7                   |
| (5) <sup>1</sup> | Ca(OH) <sub>2</sub> | -                 | 53.5              | 98.9    | 41.7                  | 14.3                  |
| (6) <sup>2</sup> | CaCO <sub>3</sub>   | -                 | 39.7              | 99.1    | 15.4                  | 0.8                   |

<sup>1</sup> Data from Sugita et al. (2016) [38]. <sup>2</sup> Data from this study.

**Table S2.** Target and measured values for the  $C_{AS0} = 1$  mg/L, single-addition tests where one type of adsorbent was employed at a time to assess As removal.

| No. | Adsorbent           | Target value        |                     | Measured value      |               |               |                     |                    |                    |                    |
|-----|---------------------|---------------------|---------------------|---------------------|---------------|---------------|---------------------|--------------------|--------------------|--------------------|
|     |                     | $W_{Ad}/V$<br>[g/L] | $C_{AS0}$<br>[mg/L] | $W_{Ad}/V$<br>[g/L] | $pH_0$<br>[-] | $pH_f$<br>[-] | $C_{AS0}$<br>[mg/L] | $C_{AS}$<br>[mg/L] | $C_{Mg}$<br>[mg/L] | $C_{Ca}$<br>[mg/L] |
| 1   | MgO                 | 0.2                 | 1                   | 0.207               | 7.18          | 10.94         | 0.998               | 0.558              | 11.2               | -                  |
| 2   | Mg(OH) <sub>2</sub> | 0.2                 | 1                   | 0.206               | 7.14          | 10.44         | 1.00                | 0.132              | 4.20               | -                  |
| 3   | MgCO <sub>3</sub>   | 0.2                 | 1                   | 0.210               | 7.03          | 10.66         | 0.989               | 0.653              | 22.5               | -                  |
| 4   | CaO                 | 0.2                 | 1                   | 0.215               | 6.97          | 11.80         | 0.995               | 0.951              | -                  | 129                |
| 5   | Ca(OH) <sub>2</sub> | 0.2                 | 1                   | 0.207               | 6.97          | 11.72         | 0.995               | 0.894              | -                  | 103                |
| 6   | CaCO <sub>3</sub>   | 0.2                 | 1                   | 0.218               | 7.03          | 9.70          | 0.989               | 0.972              | -                  | 4.69               |
| 7   | MgO                 | 0.4                 | 1                   | 0.402               | 6.91          | 10.81         | 1.00                | 0.019              | 8.12               | -                  |
| 8   | Mg(OH) <sub>2</sub> | 0.4                 | 1                   | 0.398               | 6.91          | 10.48         | 1.00                | 0.025              | 4.66               | -                  |
| 9   | MgCO <sub>3</sub>   | 0.4                 | 1                   | 0.407               | 7.26          | 10.68         | 1.00                | 0.465              | 25.0               | -                  |
| 10  | CaO                 | 0.4                 | 1                   | 0.404               | 6.91          | 12.05         | 1.00                | 0.844              | -                  | 214                |
| 11  | Ca(OH) <sub>2</sub> | 0.4                 | 1                   | 0.402               | 6.91          | 12.04         | 1.00                | 0.801              | -                  | 206                |
| 12  | CaCO <sub>3</sub>   | 0.4                 | 1                   | 0.402               | 7.26          | 9.71          | 1.00                | 0.981              | -                  | 5.04               |

\* The data for test nos.1–6 are mean values ( $n = 3$ ).

**Table S3.** Relative standard errors for test nos. 1–6 in Table S1.

| No. | Target value        |                     |                     | $\varepsilon$ [%] |        |          |          |          |
|-----|---------------------|---------------------|---------------------|-------------------|--------|----------|----------|----------|
|     | Adsorbent           | $W_{Ad}/V$<br>[g/L] | $C_{AS0}$<br>[mg/L] | $W_{Ad}/V$        | $pH_f$ | $C_{AS}$ | $C_{Mg}$ | $C_{Ca}$ |
| 1   | MgO                 | 0.2                 | 1                   | 0.9               | 0.0    | 4.7      | 3.9      | -        |
| 2   | Mg(OH) <sub>2</sub> | 0.2                 | 1                   | 0.5               | 0.1    | 3.9      | 0.2      | -        |
| 3   | MgCO <sub>3</sub>   | 0.2                 | 1                   | 0.5               | 0.1    | 4.3      | 4.0      | -        |
| 4   | CaO                 | 0.2                 | 1                   | 1.2               | 0.1    | 0.5      | -        | 2.8      |
| 5   | Ca(OH) <sub>2</sub> | 0.2                 | 1                   | 0.3               | 0.1    | 1.2      | -        | 0.4      |
| 6   | CaCO <sub>3</sub>   | 0.2                 | 1                   | 0.5               | 0.0    | 0.5      | -        | 0.3      |

**Table S4.** Target and measured values for the  $C_{AS0} = 10$  mg/L, single-addition tests where one type of adsorbent was employed at a time to assess As removal.

| No. | Target value        |                     |                     | Measured value      |               |               |                     |                    |                    |                    |
|-----|---------------------|---------------------|---------------------|---------------------|---------------|---------------|---------------------|--------------------|--------------------|--------------------|
|     | Adsorbent           | $W_{Ad}/V$<br>[g/L] | $C_{AS0}$<br>[mg/L] | $W_{Ad}/V$<br>[g/L] | $pH_0$<br>[-] | $pH_f$<br>[-] | $C_{AS0}$<br>[mg/L] | $C_{AS}$<br>[mg/L] | $C_{Mg}$<br>[mg/L] | $C_{Ca}$<br>[mg/L] |
| 13  | MgO                 | 0.2                 | 10                  | 0.204               | 7.13          | 10.89         | 10.1                | 8.37               | 10.4               | -                  |
| 14  | Mg(OH) <sub>2</sub> | 0.2                 | 10                  | 0.207               | 7.23          | 10.39         | 10.0                | 8.70               | 4.42               | -                  |
| 15  | MgCO <sub>3</sub>   | 0.2                 | 10                  | 0.210               | 7.12          | 10.59         | 10.0                | 9.14               | 20.9               | -                  |
| 16  | CaO                 | 0.2                 | 10                  | 0.204               | 7.32          | 11.81         | 9.92                | 7.59               | -                  | 118                |
| 17  | Ca(OH) <sub>2</sub> | 0.2                 | 10                  | 0.205               | 7.32          | 11.73         | 9.92                | 9.44               | -                  | 99.6               |
| 18  | CaCO <sub>3</sub>   | 0.2                 | 10                  | 0.212               | 7.12          | 9.45          | 10.0                | 10.0               | -                  | 5.39               |
| 19  | MgO                 | 0.4                 | 10                  | 0.415               | 7.32          | 10.92         | 9.92                | 6.81               | 10.3               | -                  |
| 20  | Mg(OH) <sub>2</sub> | 0.4                 | 10                  | 0.409               | 7.26          | 10.41         | 10.0                | 7.39               | 4.55               | -                  |
| 21  | MgCO <sub>3</sub>   | 0.4                 | 10                  | 0.406               | 7.32          | 10.60         | 9.92                | 8.06               | 21.9               | -                  |
| 22  | CaO                 | 0.4                 | 10                  | 0.404               | 7.15          | 12.03         | 10.2                | 4.93               | -                  | 195                |
| 23  | Ca(OH) <sub>2</sub> | 0.4                 | 10                  | 0.414               | 7.15          | 12.05         | 10.2                | 4.02               | -                  | 201                |
| 24  | CaCO <sub>3</sub>   | 0.4                 | 10                  | 0.412               | 7.32          | 9.61          | 9.92                | 9.92               | -                  | 5.54               |

**Table S5.** Target and measured values for the  $C_{AS0} = 1$  mg/L, combined-addition tests where two types of adsorbents were added at a time to assess As removal.

|     | Target value        |                     |                     | Measured value      |               |               |                     |                    |                    |                    |
|-----|---------------------|---------------------|---------------------|---------------------|---------------|---------------|---------------------|--------------------|--------------------|--------------------|
| No. | Adsorbent           | $W_{Ad}/V$<br>[g/L] | $C_{AS0}$<br>[mg/L] | $W_{Ad}/V$<br>[g/L] | $pH_0$<br>[-] | $pH_t$<br>[-] | $C_{AS0}$<br>[mg/L] | $C_{AS}$<br>[mg/L] | $C_{Mg}$<br>[mg/L] | $C_{Ca}$<br>[mg/L] |
| 25  | MgO                 | 0.2                 | 1                   | 0.216               | 6.91          | 10.84         | 1.00                | 0.001              | 8.57               | -                  |
|     | Mg(OH) <sub>2</sub> | 0.2                 |                     | 0.208               |               |               |                     |                    |                    |                    |
| 26  | MgO                 | 0.2                 | 1                   | 0.214               | 7.03          | 10.82         | 0.989               | 0.011              | 23.5               | -                  |
|     | MgCO <sub>3</sub>   | 0.2                 |                     | 0.216               |               |               |                     |                    |                    |                    |
| 27  | Mg(OH) <sub>2</sub> | 0.2                 | 1                   | 0.200               | 7.03          | 10.51         | 0.989               | 0.115              | 23.2               | -                  |
|     | MgCO <sub>3</sub>   | 0.2                 |                     | 0.212               |               |               |                     |                    |                    |                    |
| 28  | CaO                 | 0.2                 | 1                   | 0.204               | 6.91          | 12.05         | 1.00                | 0.674              | -                  | 218                |
|     | Ca(OH) <sub>2</sub> | 0.2                 |                     | 0.216               |               |               |                     |                    |                    |                    |
| 29  | CaO                 | 0.2                 | 1                   | 0.208               | 7.03          | 11.82         | 0.989               | 0.973              | -                  | 146                |
|     | CaCO <sub>3</sub>   | 0.2                 |                     | 0.210               |               |               |                     |                    |                    |                    |
| 30  | Ca(OH) <sub>2</sub> | 0.2                 | 1                   | 0.200               | 7.03          | 11.66         | 0.989               | 0.854              | -                  | 101                |
|     | CaCO <sub>3</sub>   | 0.2                 |                     | 0.214               |               |               |                     |                    |                    |                    |
| 31  | MgO                 | 0.2                 | 1                   | 0.202               | 6.91          | 11.76         | 1.00                | 0.145              | 0.59               | 105                |
|     | CaO                 | 0.2                 |                     | 0.208               |               |               |                     |                    |                    |                    |
| 32  | MgO                 | 0.2                 | 1                   | 0.212               | 6.91          | 11.77         | 1.00                | 0.425              | 0.39               | 107                |
|     | Ca(OH) <sub>2</sub> | 0.2                 |                     | 0.222               |               |               |                     |                    |                    |                    |
| 33  | MgO                 | 0.2                 | 1                   | 0.216               | 7.03          | 10.94         | 0.989               | 0.343              | 11.8               | 2.88               |
|     | CaCO <sub>3</sub>   | 0.2                 |                     | 0.214               |               |               |                     |                    |                    |                    |
| 34  | Mg(OH) <sub>2</sub> | 0.2                 | 1                   | 0.214               | 6.91          | 11.77         | 1.00                | 0.009              | 0.03               | 105                |
|     | CaO                 | 0.2                 |                     | 0.208               |               |               |                     |                    |                    |                    |
| 35  | Mg(OH) <sub>2</sub> | 0.2                 | 1                   | 0.210               | 6.91          | 11.76         | 1.00                | 0.100              | 0.03               | 102                |
|     | Ca(OH) <sub>2</sub> | 0.2                 |                     | 0.212               |               |               |                     |                    |                    |                    |
| 36  | Mg(OH) <sub>2</sub> | 0.2                 | 1                   | 0.206               | 7.03          | 10.41         | 0.989               | 0.206              | 4.15               | 2.58               |
|     | CaCO <sub>3</sub>   | 0.2                 |                     | 0.214               |               |               |                     |                    |                    |                    |
| 37  | MgCO <sub>3</sub>   | 0.2                 | 1                   | 0.218               | 7.03          | 11.50         | 0.989               | 0.003              | 0.16               | 66.3               |
|     | CaO                 | 0.2                 |                     | 0.202               |               |               |                     |                    |                    |                    |
| 38  | MgCO <sub>3</sub>   | 0.2                 | 1                   | 0.204               | 7.03          | 11.16         | 0.989               | 0.001              | 0.69               | 31.2               |
|     | Ca(OH) <sub>2</sub> | 0.2                 |                     | 0.212               |               |               |                     |                    |                    |                    |
| 39  | MgCO <sub>3</sub>   | 0.2                 | 1                   | 0.216               | 7.03          | 10.63         | 0.989               | 0.660              | 22.3               | 1.14               |
|     | CaCO <sub>3</sub>   | 0.2                 |                     | 0.210               |               |               |                     |                    |                    |                    |

**Table S6.** Target and measured values for the  $C_{AS0} = 10$  mg/L, combined-addition tests where two types of adsorbents were added at a time to assess As removal.

|     | Target value                               |                     |                     | Measured value      |               |               |                     |                    |                    |                    |
|-----|--------------------------------------------|---------------------|---------------------|---------------------|---------------|---------------|---------------------|--------------------|--------------------|--------------------|
| No. | Adsorbent                                  | $W_{Ad}/V$<br>[g/L] | $C_{AS0}$<br>[mg/L] | $W_{Ad}/V$<br>[g/L] | $pH_0$<br>[-] | $pH_t$<br>[-] | $C_{AS0}$<br>[mg/L] | $C_{AS}$<br>[mg/L] | $C_{Mg}$<br>[mg/L] | $C_{Ca}$<br>[mg/L] |
| 40  | MgO<br>Mg(OH) <sub>2</sub>                 | 0.2<br>0.2          | 10                  | 0.206<br>0.208      | 7.15          | 10.90         | 10.2                | 5.74               | 10.9               | -                  |
| 41  | MgO<br>MgCO <sub>3</sub>                   | 0.2<br>0.2          | 10                  | 0.210<br>0.210      | 7.12          | 10.76         | 10.0                | 6.65               | 18.6               | -                  |
| 42  | Mg(OH) <sub>2</sub><br>MgCO <sub>3</sub>   | 0.2<br>0.2          | 10                  | 0.200<br>0.204      | 7.12          | 10.57         | 10.0                | 7.91               | 19.5               | -                  |
| 43  | CaO<br>Ca(OH) <sub>2</sub>                 | 0.2<br>0.2          | 10                  | 0.206<br>0.208      | 7.15          | 12.02         | 10.2                | 4.08               | -                  | 193                |
| 44  | CaO<br>CaCO <sub>3</sub>                   | 0.2<br>0.2          | 10                  | 0.206<br>0.212      | 7.12          | 11.80         | 10.0                | 5.76               | -                  | 128                |
| 45  | Ca(OH) <sub>2</sub><br>CaCO <sub>3</sub>   | 0.2<br>0.2          | 10                  | 0.208<br>0.204      | 7.12          | 11.68         | 10.0                | 9.20               | -                  | 102                |
| 46  | MgO<br>CaO                                 | 0.2<br>0.2          | 10                  | 0.210<br>0.204      | 7.15          | 11.73         | 10.2                | 8.58               | 0.69               | 99.8               |
| 47  | MgO<br>Ca(OH) <sub>2</sub>                 | 0.2<br>0.2          | 10                  | 0.206<br>0.204      | 7.15          | 11.73         | 10.2                | 8.87               | 0.61               | 96.7               |
| 48  | MgO<br>CaCO <sub>3</sub>                   | 0.2<br>0.2          | 10                  | 0.208<br>0.200      | 7.12          | 10.89         | 10.0                | 8.97               | 10.1               | 2.87               |
| 49  | Mg(OH) <sub>2</sub><br>CaO                 | 0.2<br>0.2          | 10                  | 0.208<br>0.210      | 7.15          | 11.73         | 10.2                | 6.33               | 0.02               | 96.3               |
| 50  | Mg(OH) <sub>2</sub><br>Ca(OH) <sub>2</sub> | 0.2<br>0.2          | 10                  | 0.210<br>0.206      | 7.15          | 11.73         | 10.2                | 4.27               | 0.03               | 94.9               |
| 51  | Mg(OH) <sub>2</sub><br>CaCO <sub>3</sub>   | 0.2<br>0.2          | 10                  | 0.208<br>0.200      | 7.12          | 10.41         | 10.0                | 8.79               | 4.09               | 2.43               |
| 52  | MgCO <sub>3</sub><br>CaO                   | 0.2<br>0.2          | 10                  | 0.206<br>0.205      | 7.26          | 11.60         | 9.95                | 3.59               | 1.33               | 84.4               |
| 53  | MgCO <sub>3</sub><br>Ca(OH) <sub>2</sub>   | 0.2<br>0.2          | 10                  | 0.210<br>0.207      | 7.26          | 11.39         | 9.95                | 1.62               | 2.47               | 49.6               |
| 54  | MgCO <sub>3</sub><br>CaCO <sub>3</sub>     | 0.2<br>0.2          | 10                  | 0.214<br>0.214      | 7.12          | 10.54         | 10.0                | 9.04               | 18.8               | 1.14               |
